# Supplementary material for: The first HyDRA challenge for computational vibrational spectroscopy
Source: Royal Society of Chemistry journal article supplement (doi:10.1039/d3cp01216f), 2023-01-01
Supplement: d3cp01216f6.pdf [file d3cp01216f6.pdf]

## Supplementary Information – HyDRA challenge

Michael Hippler [ORCID: 0000-0002-3956-3922, email: M.Hippler@sheffield.ac.uk]

Department of Chemistry, University of Sheffield, Sheffield S3 7HF, United Kingdom

### 1 Computational Details

High-level quantum chemical calculations have been performed using the General Atomic and Molecular Electronic Structure System (GAMESS) US program package, version 30 SEP 2018 (R3), on various 64 bit Linux personal computers (office computers, typically Intel i5 and i7 quad core processors, 8 GB RAM) [MH1]. The standard 6-311++G(d,p) basis set (Pople triple split valence set with one added polarization function and one diffuse function on all atoms, including hydrogen) has been employed. Dynamic electron correlation has been included with 2nd order Møller-Plesset perturbation theory (MP2, frozen core). Calculations on molecular clusters are affected by the basis set superposition error (BSSE). For *energy*, *geometry optimization* (gradients) and *vibrational calculations* (Hessian) on molecular clusters, the BSSE was corrected using a suite of self-written programmes and scripts [MH2-5], implementing the counterpoise correction procedure (CP) as proposed by Boys and Bernardi [MH6] within GAMESS. In the following, we call this method CP MP2/6311++G(d,p). In addition, after trialing various alternative basis sets on the training set, we performed calculations with a reduced basis set, 6-31++G(2d,p), a Pople double split valence set with 2 added *d* polarisation functions and one *p* function on hydrogen, and one diffuse function on all atoms, including hydrogens. We refer to this method as **CP MP2/631++G(2d,p)**. Uncertainties in frequency shift calculations are obviously very difficult to estimate, but the RMS of errors in the training set is about 8%. In the manuscript, this is **submission PH5**.

Geometry optimizations were performed with very tight convergence criteria with remaining gradients below  $10^{-6}$  Hartree/Bohr in order to obtain well-defined equilibrium geometries (for comparison, the default is  $10^{-4}$  Hartree/Bohr). The nature of stationary states (minimum structures or transition states) was confirmed by CP corrected frequency calculations with numerical derivatives of the gradients, where positive and negative Cartesian displacements were enforced to increase the accuracy. A vibrational scaling factor of 0.95 was used to partially compensate for anharmonicities and other effects for zero-point energies ( $\Delta E_0$ ) and thermodynamic properties.

In calculations for the training set it has been found that CP MP2/631++G(2d,p) performs (surprisingly) well, better than the more involved CP MP2/6311++G(d,p). This surely must be due to some extent of error compensations. For convenience, we submit values using this method as the first of our 2 submissions. We believe that more accurate calculations which do not rely as much to fortuitous error compensations must include harmonic couplings and anharmonic effects in the water vibrational modes. In isolated water, the O-H stretching local vibrations combine in the harmonic approximation to the asymmetric O-H stretching normal mode (higher in frequency than the O-H local mode), and the symmetric O-H stretching normal mode (lower in frequency than the O-H local mode). In the complex, the harmonic O-H

stretching modes resemble more local modes, however. If frequency shifts are referenced to the combined normal modes in isolated water and the (approximately) local mode in the complex, then the shift depends on the accuracy of the description of the hydrogen bonding in the complex, and in addition on how well the splitting of harmonic modes in isolated water is modeled. Frequency shifts are also affected by anharmonic interactions, in particular the Fermi resonance between the bending and (symmetric) stretching modes in water. This is an issue in accurate frequency shift calculations, in particular since the Fermi resonance will become more pronounced in the complex where the red shift of the symmetric stretching vibration will bring the two interacting vibrations closer together and thus tune more into resonance. We therefore decided to include in the CP MP2/6311++G(d,p) calculations anharmonic effects for the water vibrations, all the while continuing with CP corrections. Since full dimensional potential energy surface calculations are not feasible, we have to use some severe approximations to capture the essential effects of anharmonic interactions of water vibrations. We have self-written programmes and scripts to implement the following within GAMESS:

Using the harmonic normal mode water vibrations (bending, symmetric and asymmetric stretching) following from the CP MP2/6311++G(d,p) calculation of the complex, find the displacement of water atoms during these modes. Energies are then sampled along the directions of the harmonic normal modes and along pairs of harmonic normal modes (2-D grids along each pair of normal modes), using the Quartic Force Field (QFF) approximation of Yagi et al. [MH7], which computes a fit to the derivatives up to fourth order by computing a specialized set of geometry points. These calculations are only done for water normal modes; modes and displacements of the complex partner are not included. In the CP corrected energy calculations, the complex partner is only included in its frozen geometry of the CP corrected equilibrium complex. The justification for not including modes of the complex partner is first it would be too computationally involved, and second, in the weakly hydrogen bound complex it is thought that water and complex partner vibrations do not interact much (but see below). Vibrational wavefunctions are then obtained by GAMESS at an SCF-like level, termed VSCF, using product nuclear wavefunctions, along with an MP2-like correction to the vibrational energy, which is termed correlation corrected (cc-VSCF) [MH8-10]. For IR intensity calculations, the harmonic dipole derivative tensor is used, rather than computing dipoles along the anharmonic grid points.

In some occasions, we have found that water normal modes (*e.g.*, the water bending mode) are mixed with complex partner normal modes in the harmonic approximation, which causes problems in our simplified approach assuming isolated water modes. An effective way to avoid this unwanted mixing is to do frequency calculations where all H of the complex partner are deuterated to D which in almost all cases shift vibrations away to leave the water vibrations isolated. Where there is no mixing to start with, this procedure gives almost the same frequency shift than without deuteration. We finally call this method including CP corrections and selected anharmonic effects in MP2 calculations of water complexes '**CP MP2/6311++G(d,p) 2-D QFF cc-VSCF**'. In the manuscript, this is **submission AC4**. More details will be presented in a forthcoming publication [MH11]. We consider this method as our best effort concerning methodology and submit results as the second set of our 2 submissions. Again, uncertainties are very difficult to estimate for this method, but the RMS of errors in the training set is about 21%. This rather large RMS is dominated by 2 outliers; reasons for these outliers are unclear at present, but might be related to anharmonic interactions not captured by our simplified treatment.

- [MH1] Schmidt, M. W.; Baldrige, K. K.; Boatz, J. A.; Elbert, S. T.; Gordon, M. S.; Jensen, J. H.; Koseki, S.; Matsunaga, N.; Nguyen, K. A.; Su, S.; Windus, T. L.; Dupuis, M.; Montgomery Jr, J. A., General atomic and molecular electronic structure system. *J. Comp. Chem.* 1993, 14 (11), 1347-1363. DOI: 10.1002/jcc.540141112
- [MH2] Hippler, M., Quantum-chemical study of  $\text{CHCl}_3\text{-SO}_2$  association. *J. Chem. Phys.* 2005, 123 (20), 204311. DOI: 10.1063/1.2121609
- [MH3] Chung, S.; Hippler, M., Infrared spectroscopy of hydrogen-bonded  $\text{CHCl}_3\text{-SO}_2$  in the gas phase. *The J. Chem. Phys.* 2006, 124 (21), 214316. DOI: 10.1063/1.2207617
- [MH4] Hippler, M., Quantum chemical study and infrared spectroscopy of hydrogen-bonded  $\text{CHCl}_3\text{-NH}_3$  in the gas phase. *J. Chem. Phys.* 2007, 127 (8), 084306. DOI: 10.1063/1.2757176
- [MH5] Hippler, M.; Hesse, S.; Suhm, M. A., Quantum-chemical study and FTIR jet spectroscopy of  $\text{CHCl}_3\text{-NH}_3$  association in the gas phase. *Phys. Chem. Chem. Phys.* 2010, 12 (41), 13555-13565. DOI: 10.1039/c0cp00530d
- [MH6] Boys, S. F.; Bernardi, F., The calculation of small molecular interactions by the differences of separate total energies. Some procedures with reduced errors. *Mol. Phys.* 1970, 19 (4), 553-566. DOI: 10.1080/00268977000101561
- [MH7] Yagi, K.; Hirao, K.; Taketsugu, T.; Schmidt, M. W.; Gordon, M. S., Ab initio vibrational state calculations with a quartic force field: applications to  $\text{H}_2\text{CO}$ ,  $\text{C}_2\text{H}_4$ ,  $\text{CH}_3\text{OH}$ ,  $\text{CH}_3\text{CCH}$ , and  $\text{C}_6\text{H}_6$ . *J. Chem. Phys.* 2004, 121, 1383-1389. DOI: 10.1063/1.1764501
- [MH8] Gerber, R. B.; Jung, J. O., in "Computational Molecular Spectroscopy", Jensen, P.; Bunker, P.R., eds., Wiley and Sons, Chichester, 2000, pp 365-390.
- [MH9] Chaban, G. M.; Jung, J. O.; Gerber, R.B., Ab initio calculation of anharmonic vibrational states of polyatomic systems: Electronic structure combined with vibrational self-consistent field. *J. Chem. Phys.* 1999, 111, 1823-1829. DOI: 10.1063/1.479452
- [MH10] Matsunaga, N.; Chaban, G. M.; Gerber, R. B., Degenerate perturbation theory corrections for the vibrational self-consistent field approximation: Method and applications. *J. Chem. Phys.* 2002, 117, 3541-3547. DOI: 10.1063/1.1494978
- [MH11] Hippler, M., in preparation, to be published.

## 2 Additional computed data

### Summary of results:

Set 1 (PH5), CP MP2/631++G(2d,p):

Calculated reference for water symmetric stretching fundamental: **3850.03 cm<sup>-1</sup>**, IR intensity **11.6 km mol<sup>-1</sup>**.

#### HyDRA Training Set

| Molecule                                 | CAS-number | exp. OH <sub>b</sub> shift / cm <sup>-1</sup> | calc. OH <sub>b</sub> shift / cm <sup>-1</sup> | IR int. / km mol <sup>-1</sup> | $\Delta E_{el}$ / kJ mol <sup>-1</sup> | $\Delta E_0$ / kJ mol <sup>-1</sup> | $r_e$ / Å                    |
|------------------------------------------|------------|-----------------------------------------------|------------------------------------------------|--------------------------------|----------------------------------------|-------------------------------------|------------------------------|
| <b>ACE</b> Acetone                       | 67-64-1    | 119 / 126 <sup>a)</sup>                       | <b>120.2</b>                                   | 322.7                          | -24.2                                  | -17.0                               | 1.98 OH...O=C                |
| <b>APH</b> Acetophenone                  | 98-86-2    | 121 / 127 <sup>a)</sup>                       | <b>119.1</b>                                   | 434.8                          | -23.8                                  | -17.1                               | 1.98 OH...O=C                |
| <b>TFB</b><br>1,2,4,5-Tetrafluorobenzene | 327-54-8   | 10                                            | <b>9.5</b>                                     | 9.8                            | -14.1                                  | -10.0                               | 2.35 HO...HC,<br>2.36 OH...F |
| <b>POH</b> 1-Phenylethanol               | 98-85-1    | 37                                            | <b>38.4</b>                                    | 47.4                           | -26.1                                  | -19.7                               | 2.08 HO...HOC                |
| <b>IMZ</b> Imidazole                     | 288-32-4   | 199                                           | <b>188.4</b>                                   | 535.8                          | -28.2                                  | -21.1                               | 2.00 OH...N                  |
| <b>ANL</b> Aniline                       | 62-53-3    | 133                                           | <b>152.8</b>                                   | 437.1                          | -21.8                                  | -15.1                               | 2.08 OH...N                  |
| <b>DBF</b> Dibenzofuran                  | 132-64-9   | 34                                            | <b>38.9</b>                                    | 116.0                          | -15.2                                  | -10.0                               | 2.12 OH...O                  |
| <b>DBN</b> Di-tert-butyl nitroxide       | 2406-25-9  | 173                                           | <b>151.7</b>                                   | 350.6                          | -28.3                                  | -21.7                               | 1.90 OH...O                  |
| <b>OCP</b> o-Cyanophenol                 | 611-20-1   | 62                                            | <b>60.0</b>                                    | 60.8                           | -35.8                                  | -27.8                               | 1.86 HO...HOC                |
| <b>CBU</b> Cyclobutanone                 | 1191-95-3  | 109                                           | <b>108.9</b>                                   | 251.9                          | -23.4                                  | -16.6                               | 2.01 OH...O                  |

<sup>a)</sup> Deperturbed.

#### HyDRA Challenge Set

| abbreviation - Molecule                                      | CAS-number  | calc. OH <sub>b</sub> shift / cm <sup>-1</sup> | IR int. / km mol <sup>-1</sup> | $\Delta E_{el}$ / kJ mol <sup>-1</sup> | $\Delta E_0$ / kJ mol <sup>-1</sup> | $r_e$ / Å                      |
|--------------------------------------------------------------|-------------|------------------------------------------------|--------------------------------|----------------------------------------|-------------------------------------|--------------------------------|
| <b>FAH</b> Formaldehyde                                      | 50-00-0     | <b>77.3</b>                                    | 145.4                          | -19.9                                  | -12.4                               | 2.06 OH...O                    |
| <b>THF</b> Tetrahydrofuran                                   | 109-99-9    | <b>176.4</b>                                   | 378.1                          | -26.5                                  | -18.8                               | 1.90 OH...O                    |
| <b>THT</b> Tetrahydrothiophene                               | 110-01-0    | <b>129.8</b>                                   | 240.2                          | -21.0                                  | -14.9                               | 2.45 OH...S                    |
| <b>PYR</b> Pyridine                                          | 110-86-1    | <b>195.8</b>                                   | 603.8                          | -25.7                                  | -18.8                               | 2.01 OH...N                    |
| <b>CON</b> Cyclooctanone <sup>b)</sup>                       | 502-49-8    | <b>141.8</b> <sup>b)</sup>                     | 363.2                          | -26.4                                  | -19.2                               | 1.96 OH...O                    |
|                                                              |             | <b>129.7</b> <sup>b)</sup>                     | 277.5                          | -26.0                                  | -19.0                               | 1.97 OH...O                    |
| <b>DMI</b> 1,3-Dimethyl-2-imidazolidinone                    | 80-73-9     | <b>143.0</b>                                   | 454.3                          | -28.2                                  | -21.3                               | 1.92 OH...O                    |
| <b>TPH</b> 2,2,2-Trifluoroacetophenone                       | 434-45-7    | <b>43.5</b>                                    | 112.9                          | -18.9                                  | -13.3                               | 2.08 OH...O                    |
| <b>TFE</b> 2,2,2-Trifluoroethan-1-ol                         | 75-89-8     | <b>11.9</b>                                    | 13.0                           | -27.7                                  | -21.0                               | 1.94 HO...HOC                  |
| <b>MLA</b> Methyl lactate                                    | 547-64-8    | <b>109.4</b>                                   | 361.3                          | -29.0                                  | -19.4                               | 1.98 OH...O,<br>1.98 HO...HOC  |
|                                                              |             |                                                | 66.6                           | -30.0                                  | -23.2                               | 1.96 HO...HOC                  |
| <b>PCD</b><br>1-Phenylcyclohexane-cis-1,2-diol <sup>c)</sup> | 125132-75-4 | <b>50.6</b> <sup>c)</sup>                      | 66.6                           | -30.0                                  | -23.2                               | 1.96 HO...HOC                  |
|                                                              |             | <b>124.6</b> <sup>c)</sup>                     | 347.6                          | -28.4                                  | -20.2                               | 1.96 OH...OC,<br>1.99 HO...HOC |

<sup>b)</sup> 2 complexes found with nearly the same energy, complex b (slightly more stable) and complex a.

<sup>c)</sup> 2 complexes found with close energy, complex acc (more stable) and complex int.

**Set 2 (AC4), CP MP2/6311++G(d,p) 2-D QFF cc-VSCF:**

Calculated reference for water symmetric stretching fundamental: **3732.40 cm<sup>-1</sup>**, IR intensity **12.7 km mol<sup>-1</sup>**.

**HyDRA Training Set**

| Abbreviation - Molecule                  | CAS-number | exp. OH <sub>b</sub> shift / cm <sup>-1</sup> | calc. OH <sub>b</sub> shift / cm <sup>-1</sup> | IR int. / km mol <sup>-1</sup> | ΔE <sub>el</sub> / kJ mol <sup>-1</sup> | ΔE <sub>0</sub> / kJ mol <sup>-1</sup> | r <sub>e</sub> / Å           |
|------------------------------------------|------------|-----------------------------------------------|------------------------------------------------|--------------------------------|-----------------------------------------|----------------------------------------|------------------------------|
| <b>ACE</b> Acetone                       | 67-64-1    | 119 / 126 <sup>a)</sup>                       | <b>127.7</b>                                   | 264.1                          | -22.4                                   | -15.5                                  | 2.02 OH...O=C                |
| <b>APH</b> Acetophenone                  | 98-86-2    | 121 / 127 <sup>a)</sup>                       | <b>128.0</b>                                   | 358.2                          | -22.1                                   | -15.8                                  | 2.02 OH...O=C                |
| <b>TFB</b><br>1,2,4,5-Tetrafluorobenzene | 327-54-8   | 10                                            | <b>5.8</b>                                     | 11.0                           | -13.8                                   | -9.5                                   | 2.35 HO...HC,<br>2.43 OH...F |
| <b>POH</b> 1-Phenylethanol               | 98-85-1    | 37                                            | <b>34.1</b>                                    | 33.2                           | -24.9                                   | -18.8                                  | 2.08 HO...HOC                |
| <b>IMZ</b> Imidazole                     | 288-32-4   | 199                                           | <b>234.9</b>                                   | 532.3                          | -28.0                                   | -20.7                                  | 2.02 OH...N                  |
| <b>ANL</b> Aniline                       | 62-53-3    | 133                                           | <b>182.4</b>                                   | 383.2                          | -21.6                                   | -14.8                                  | 2.10 OH...N                  |
| <b>DBF</b> Dibenzofuran                  | 132-64-9   | 34                                            | <b>42.0</b>                                    | 102.7                          | -14.6                                   | -9.5                                   | 2.14 OH...O                  |
| <b>DBN</b> Di-tert-butyl nitroxide       | 2406-25-9  | 173                                           | <b>174.5</b>                                   | 318.1                          | -27.6                                   | -21.0                                  | 1.92 OH...O                  |
| <b>OCP</b> o-Cyanophenol                 | 611-20-1   | 62                                            | <b>47.4</b>                                    | 36.6                           | -33.3                                   | -26.3                                  | 1.88 HO...HOC                |
| <b>CBU</b> Cyclobutanone                 | 1191-95-3  | 109                                           | <b>111.4</b>                                   | 197.4                          | -21.1                                   | -14.5                                  | 2.06 OH...O                  |

<sup>a)</sup> Deperturbed.

**HyDRA Challenge Set**

| abbreviation - Molecule                                      | CAS-number  | calc. OH <sub>b</sub> shift / cm <sup>-1</sup> | IR int. / km mol <sup>-1</sup> | ΔE <sub>el</sub> / kJ mol <sup>-1</sup> | ΔE <sub>0</sub> / kJ mol <sup>-1</sup> | r <sub>e</sub> / Å             |
|--------------------------------------------------------------|-------------|------------------------------------------------|--------------------------------|-----------------------------------------|----------------------------------------|--------------------------------|
| <b>FAH</b> Formaldehyde                                      | 50-00-0     | <b>78.2</b>                                    | 111.9                          | -17.7                                   | -10.6                                  | 2.10 OH...O                    |
| <b>THF</b> Tetrahydrofuran                                   | 109-99-9    | <b>191.9</b>                                   | 349.4                          | -24.8                                   | -17.8                                  | 1.93 OH...O                    |
| <b>THT</b> Tetrahydrothiophene                               | 110-01-0    | <b>158.4</b>                                   | 217.0                          | -19.0                                   | -12.9                                  | 2.47 OH...S                    |
| <b>PYR</b> Pyridine                                          | 110-86-1    | <b>238.8</b>                                   | 579.2                          | -25.3                                   | -18.3                                  | 2.02 OH...N                    |
| <b>CON</b> Cyclooctanone <sup>b)</sup>                       | 502-49-8    | <b>150.3</b> <sup>b)</sup>                     | 302.4                          | -24.2                                   | -17.3                                  | 2.00 OH...O                    |
|                                                              |             | <b>141.0</b> <sup>b)</sup>                     | 251.8                          | -23.8                                   | -17.0                                  | 2.01 OH...O                    |
| <b>DMI</b> 1,3-Dimethyl-2-imidazolidinone                    | 80-73-9     | <b>155.7</b>                                   | 406.5                          | -26.9                                   | -19.8                                  | 1.95 OH...O                    |
| <b>TPH</b> 2,2,2-Trifluoroacetophenone                       | 434-45-7    | <b>40.8</b>                                    | 87.5                           | -17.6                                   | -12.0                                  | 2.12 OH...O                    |
| <b>TFE</b> 2,2,2-Trifluoroethan-1-ol                         | 75-89-8     | <b>1.8</b>                                     | 13.3                           | -26.9                                   | -20.9                                  | 1.96 HO...HOC                  |
| <b>MLA</b> Methyl lactate                                    | 547-64-8    | <b>109.6</b>                                   | 237.7                          | -28.0                                   | -18.6                                  | 2.03 OH...O,<br>2.02 HO...HOC  |
| <b>PCD</b><br>1-Phenylcyclohexane-cis-1,2-diol <sup>c)</sup> | 125132-75-4 | <b>50.5</b> <sup>c)</sup>                      | 52.4                           | -27.7                                   | -21.8                                  | 1.96 HO...HOC                  |
|                                                              |             | <b>128.9</b> <sup>c)</sup>                     | 210.4                          | -26.1                                   | -18.2                                  | 2.01 OH...OC,<br>2.05 HO...HOC |

<sup>b)</sup> 2 complexes found with nearly the same energy, complex b (slightly more stable) and complex a.

<sup>c)</sup> 2 complexes found with close energy, complex acc (more stable) and complex int.

Figures showing CP-corrected equilibrium geometries of the challenge set, CP MP2/6311++G(d,p)

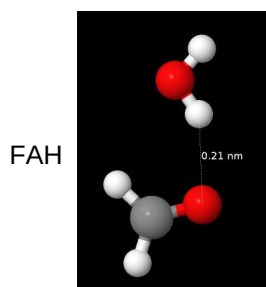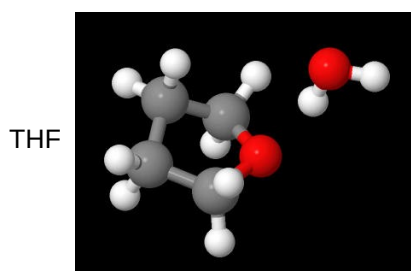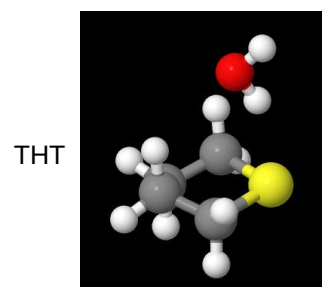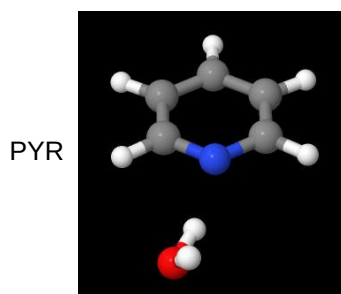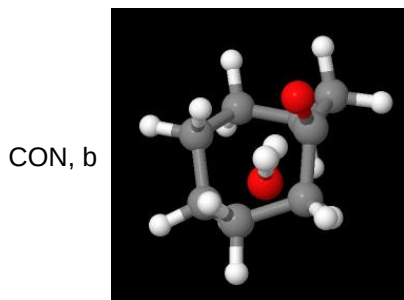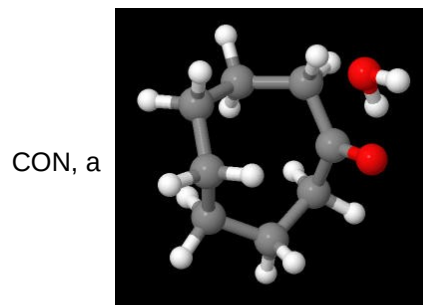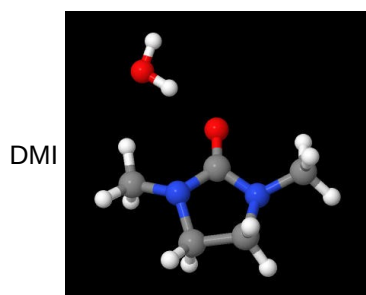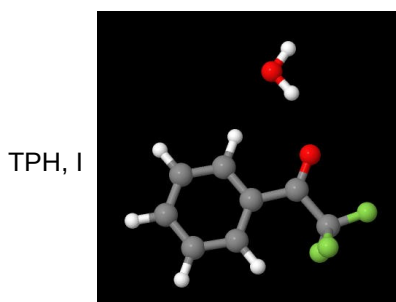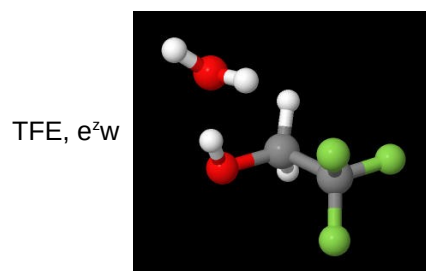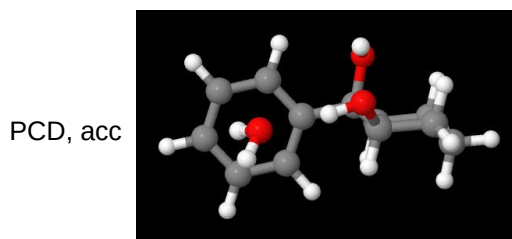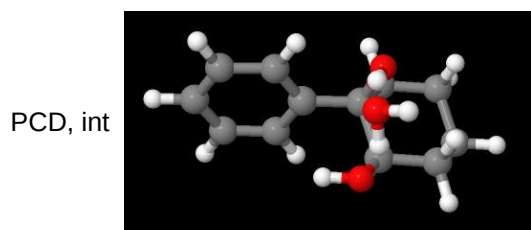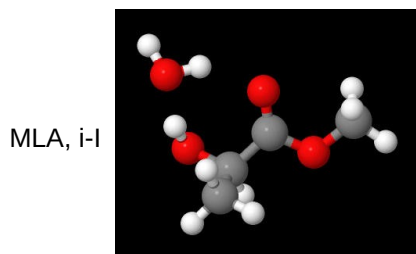

Figures showing CP-corrected equilibrium geometries of the training set, CP MP2/6311++G(d,p)

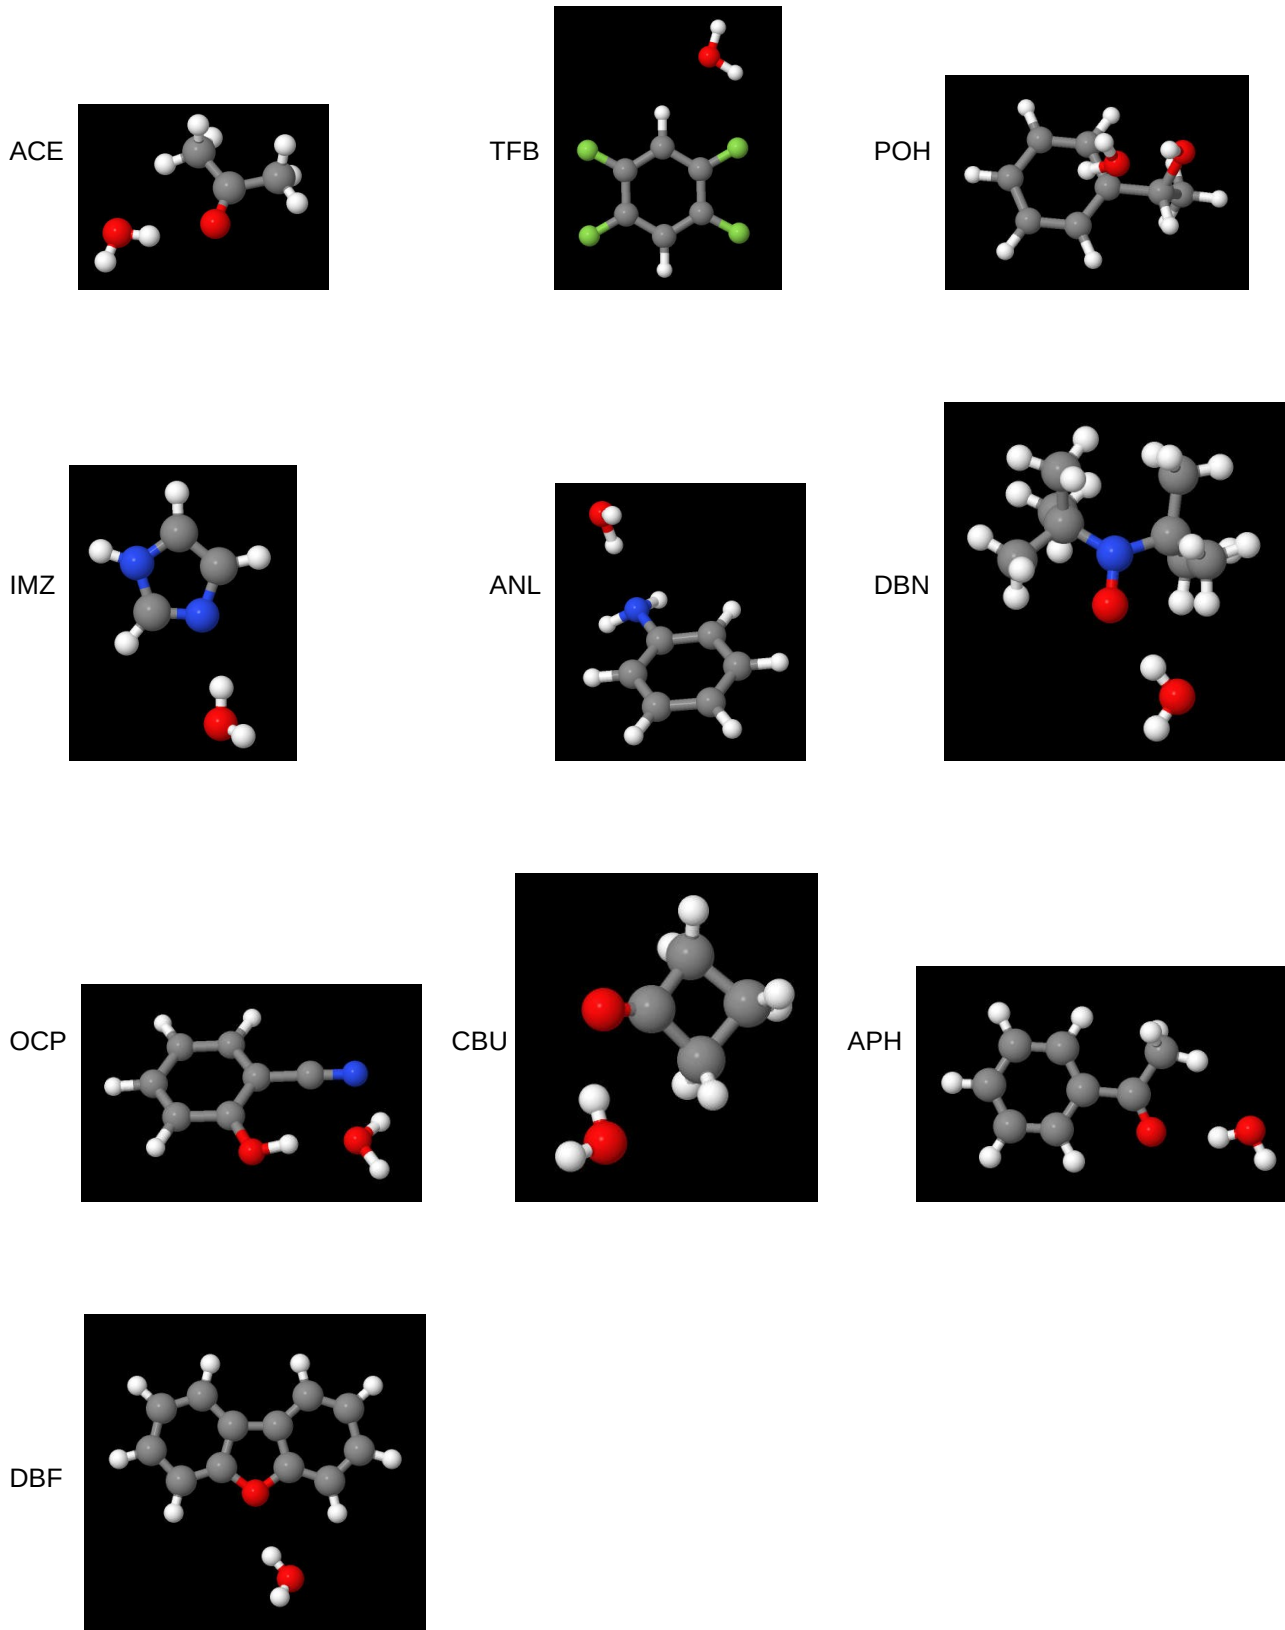

### 3 Additional computed data: the water dimer

After completing the challenge, and as a reference, we have also calculated the water dimer using both our methods. For comparison, experimental values are  $3657\text{ cm}^{-1}$  for the symmetric OH- stretching vibration of the water monomer (Herzberg). The experimental value for the water dimer H-donor bound OH-stretching vibration is still subject to some debate, but the accepted value seems to be  $3601\text{ cm}^{-1}$  (Huisken, F.; Kaloudis, M.; Kulcke, A., Infrared spectroscopy of small size-selected water clusters. J. Chem. Phys. 1996, 104, 17. DOI: 10.1063/1.470871). This would imply an experimental OH<sub>b</sub> shift of **-56**  $\text{cm}^{-1}$ .

#### Summary of calculations:

##### Set 1 (PH5), CP MP2/631++G(2d,p):

|                                                  |                      |
|--------------------------------------------------|----------------------|
| calc. OH <sub>b</sub> shift / $\text{cm}^{-1}$ : | <b>-79.1</b>         |
| IR int. / $\text{km mol}^{-1}$                   | 233.2                |
| $\Delta E_{\text{el}}$ / $\text{kJ mol}^{-1}$    | -19.3                |
| $\Delta E_0$ / $\text{kJ mol}^{-1}$              | -11.1                |
| $r_e$ / Å                                        | 2.03 (OH $\cdots$ O) |

##### Set 2 (AC4), CP MP2/6311++G(d,p) 2-D QFF cc-VSCF:

|                                                  |                      |
|--------------------------------------------------|----------------------|
| calc. OH <sub>b</sub> shift / $\text{cm}^{-1}$ : | <b>-76.8</b>         |
| IR int. / $\text{km mol}^{-1}$                   | 191.9                |
| $\Delta E_{\text{el}}$ / $\text{kJ mol}^{-1}$    | -19.0                |
| $\Delta E_0$ / $\text{kJ mol}^{-1}$              | -11.4                |
| $r_e$ / Å                                        | 2.06 (OH $\cdots$ O) |

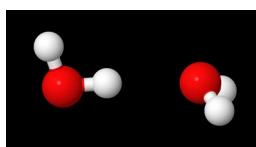

CP-corrected equilibrium geometry of water dimer, CP MP2/6311++G(d,p).

As a curious aside, CP MP2/6311++G(d,p) (without anharmonic corrections) gives a shift of  $-55.5\text{ cm}^{-1}$ , in perfect agreement with the expected  $-56\text{ cm}^{-1}$ .

In conclusion, the water dimer calculations seem to be far less satisfactory, predicting shifts which seem significantly too large. The reasons are unclear, but probably related to the wide amplitude motions of these light molecules and harmonic and anharmonic couplings of close vibrational modes of the two water units. Clearly, more sophisticated anharmonic calculations, possibly fully-dimensional, are required, and also a definite resolution, assignment and conclusion of experimental data.
